# Supplementary material for: Nanocasting synthesis of mesoporous SnO2 with a tunable ferromagnetic response through Ni loading
Source: Royal Society of Chemistry journal article supplement (doi:10.1039/c6ra23918h), 2016-01-01
Supplement: c6ra23918h1.pdf [file c6ra23918h1.pdf]

Supporting Information

**Nanocasting synthesis of mesoporous SnO<sub>2</sub> with tunable ferromagnetic response through Ni loading**

By Junpeng Fan,<sup>a</sup> Jin Zhang,<sup>a</sup> Pau Solsona,<sup>a</sup> Santiago Suriñach,<sup>a</sup> Maria Dolors Baró,<sup>a</sup> Jordi Sort,<sup>ab</sup> Eva Pellicer<sup>\*a</sup>

<sup>a</sup>Departament de Física, Facultat de Ciències, Universitat Autònoma de Barcelona, E-08193 Bellaterra, Barcelona, Spain. \*[Eva.Pellicer@uab.cat](mailto:Eva.Pellicer@uab.cat)

<sup>b</sup>Institució Catalana de Recerca i Estudis Avançats (ICREA), Pg. Lluís Companys 23, E-08010 Barcelona, Spain.

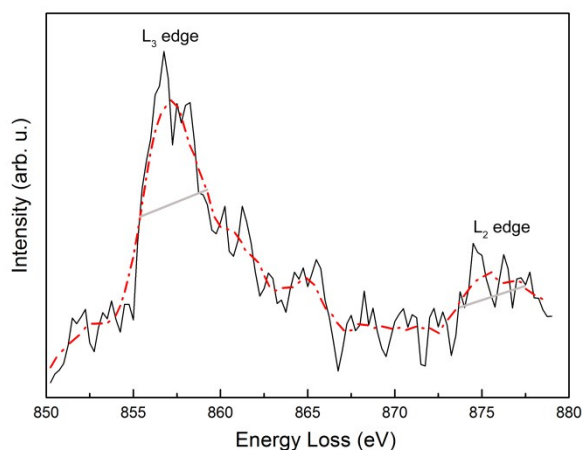

**Figure S1.** Representative single Ni L<sub>2,3</sub> spectrum extracted from a spectrum image (raw data and splined fit) for the sample with 6% Ni. Spectrum was taken on the coating surrounding the SnO<sub>2</sub> pores. The integrated intensity ratio of L<sub>3</sub> and L<sub>2</sub> ionization edges gives a value of 2.8.
